# Supplementary material for: A facile synthesis of an Fe/N-doped ultrathin carbon sheet for highly efficient oxygen reduction reaction
Source: Royal Society of Chemistry journal article supplement (doi:10.1039/d0qi01034k), 2020-01-01
Supplement: d0qi01034k1.pdf [file d0qi01034k1.pdf]

## Electronic Supplementary Information

# **A Facile Synthesis of Fe/N-doped Ultrathin Carbon Sheet for Highly Efficient Oxygen Reduction Reaction**

Pingping Zhao, Qiuxiang Mou, Xinghai Liu, Houbin Li, and Gongzhen Cheng

## Table of contents

|                               |    |
|-------------------------------|----|
| 1. Supplementary Figures..... | 1  |
| 2. Supplementary Tables ..... | 8  |
| Reference.....                | 11 |

## 1. Supplementary Figures

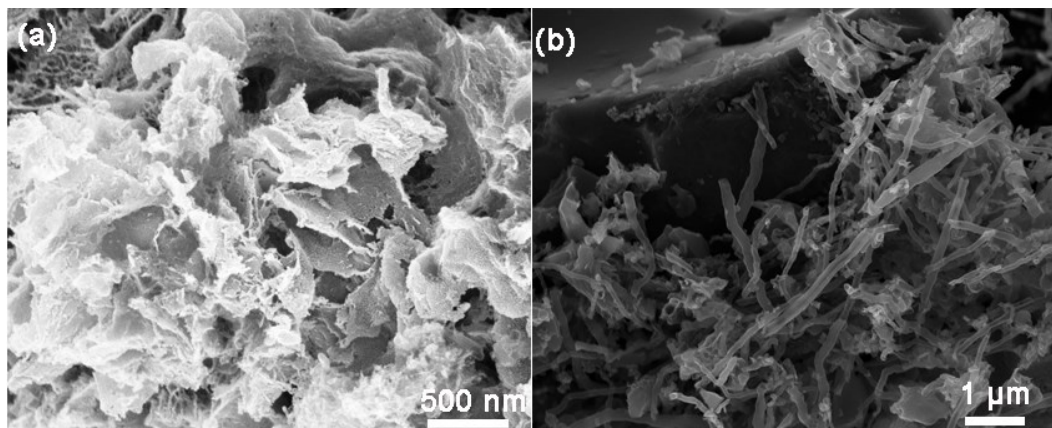

Figure S1. SEM images of the catalysts Fe<sub>3</sub>C/NC-800 and FeNC-800-M.

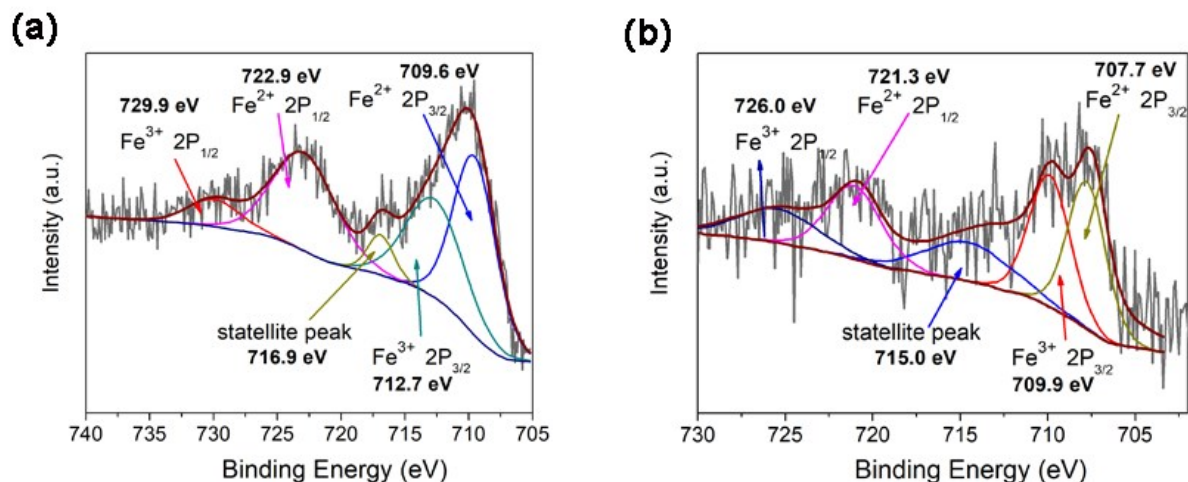

Figure S2. High resolution of Fe 2p of (a) Fe<sub>3</sub>C/NC-800 and (b) FeNC-800-M.

(Fe<sub>3</sub>C/NC-800 exhibited a much larger binding energy than that of FeNC-800-M, and Fe (II) and Fe (III) type with different binding energy can be distinguished. The peak of Fe<sup>3+</sup> 2p<sub>3/2</sub> was considered to be Fe connected to N, the resulting FeN<sub>4</sub> structure is generally recognized as the active sites, especially in alkaline solution.)

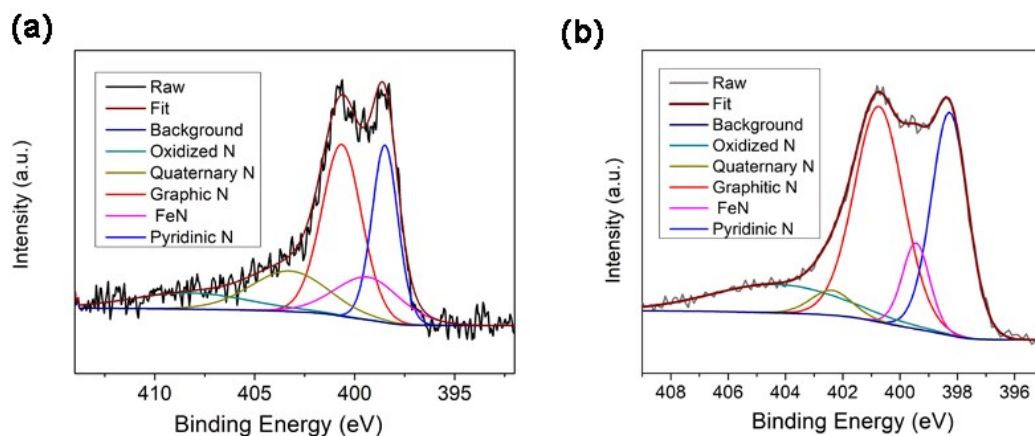

Figure S3. High resolution of N 1s of (a) Fe<sub>3</sub>C/NC-800 and (b) FeNC-800-M.

(The binding energy could be divided into five types: graphitic N, pyridinic N, oxidized N, quaternary N and FeN. In ORR catalytic process, pyridinic N and FeN<sub>x</sub> was thought to be the major contributor to enhance the electrochemical performance.)

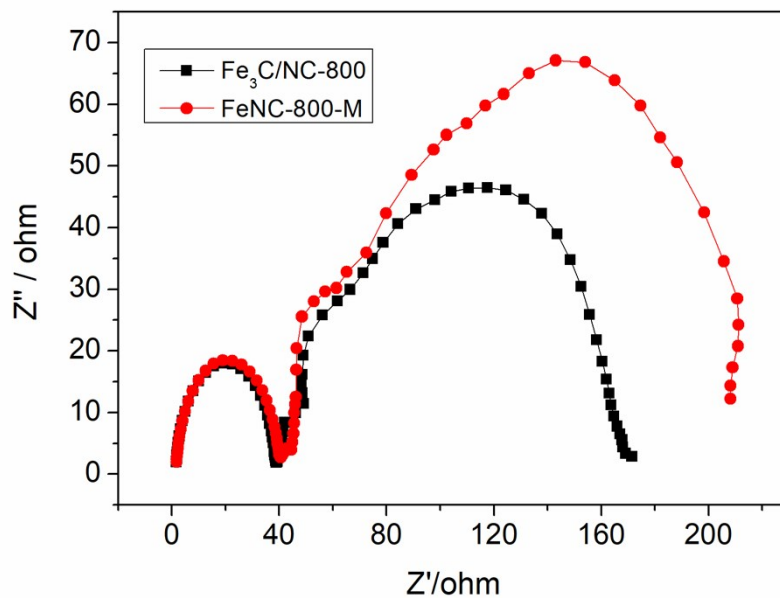

Figure S4. Electrochemical impedance spectroscopy data for FeNC-800-M (red line) and Fe<sub>3</sub>C/NC-800 (black line).

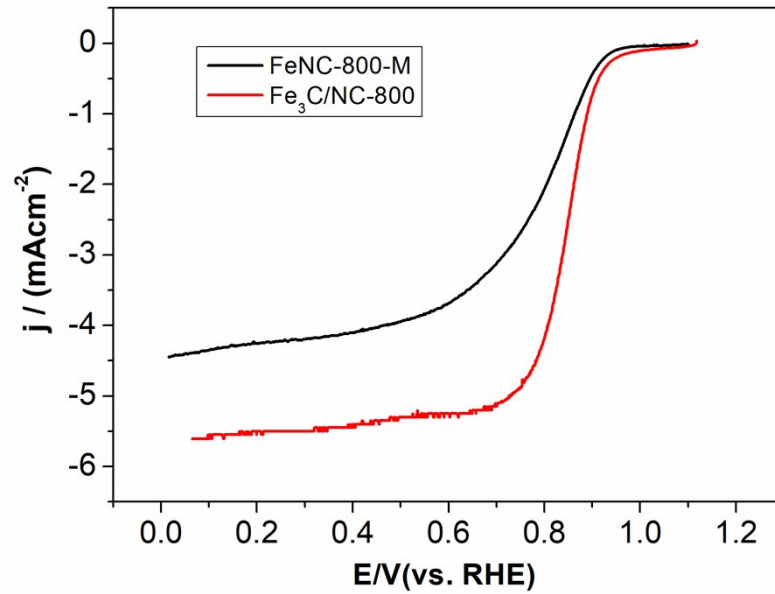

Figure S5. Steady-state polarization curves of ORR for Fe<sub>3</sub>C/NC-800 (red line) and FeNC-800-M (black line) in 0.1M KOH solution.

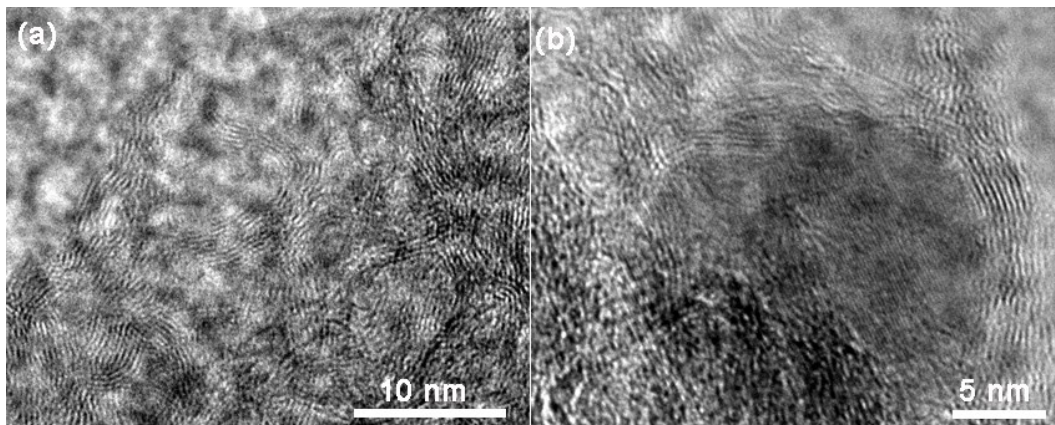

Figure S6. HRTEM images of the catalysts Fe<sub>3</sub>C/NC-800.

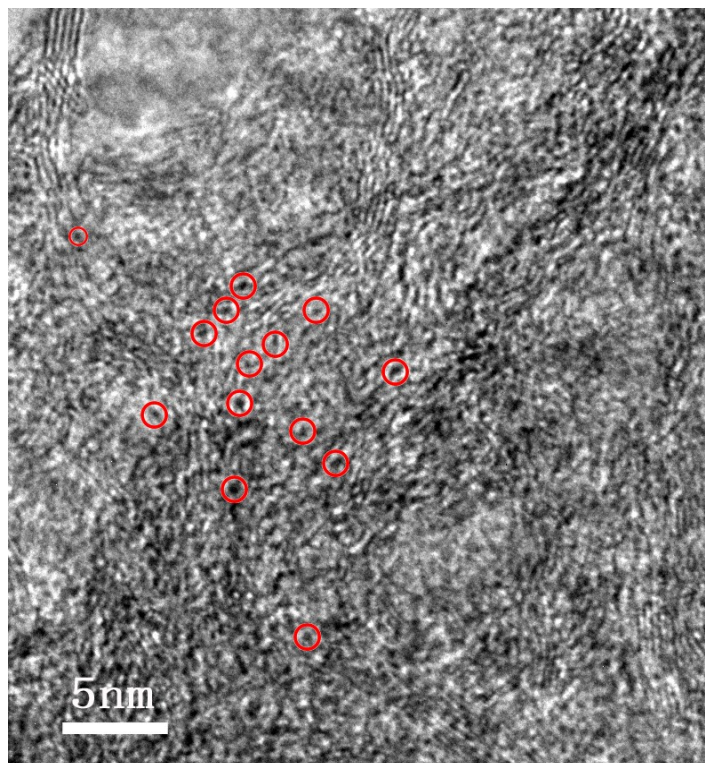

Figure S7. High resolution TEM image of Fe<sub>3</sub>C/NC-800.

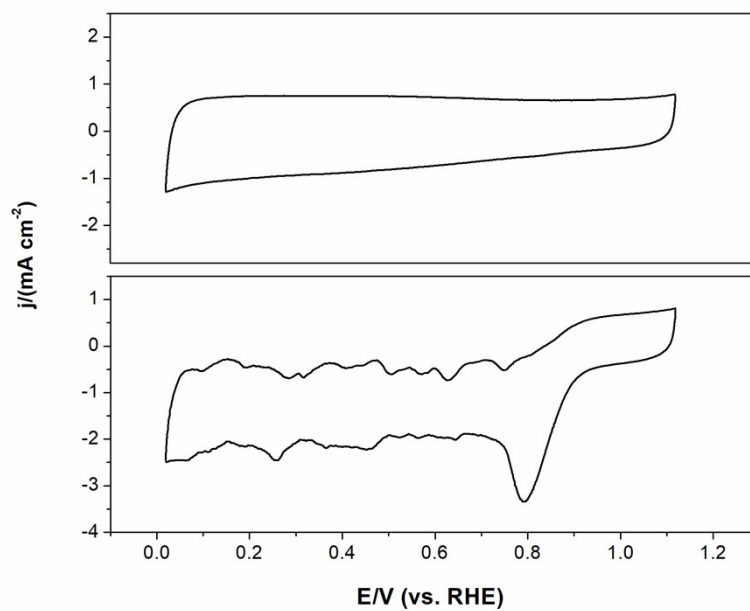

Figure S8. Cyclic voltammograms for Fe<sub>3</sub>C/NC-800 obtained in 0.1 M KOH with Ar (up) and O<sub>2</sub> (down) saturated. The scan was performed negatively.

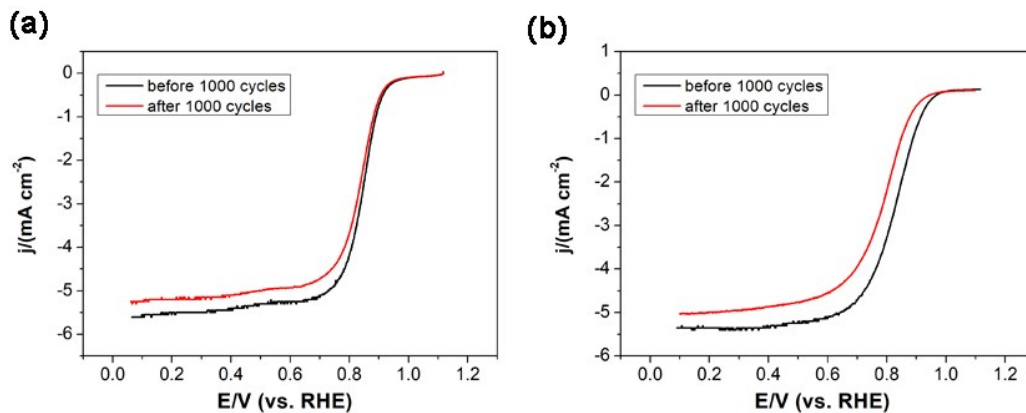

Figure S9. The activities after 1000 cycles of Fe<sub>3</sub>C/NC-800 and Pt/C in an O<sub>2</sub>-saturated 0.1 M KOH solution.

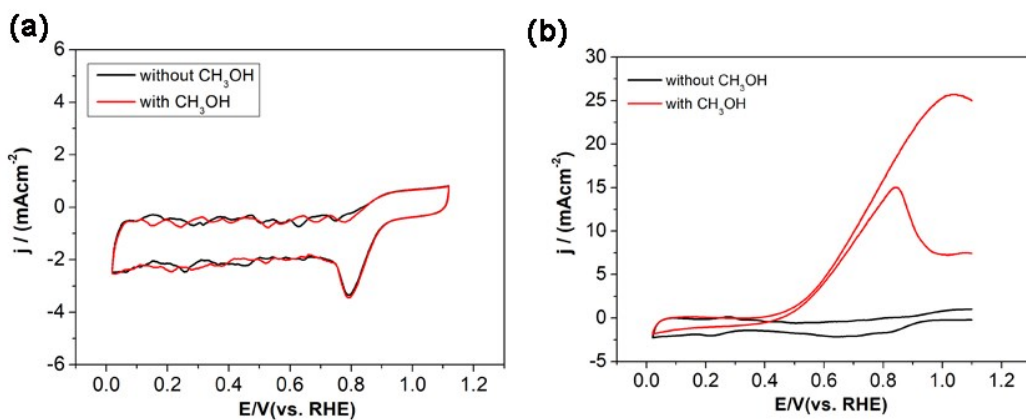

Figure S10. Cyclic voltammograms of (a) Fe<sub>3</sub>C/NC-800 and (b) Pt/C in an O<sub>2</sub>-saturated 0.1 M KOH solution containing 1M methanol. The scan was performed negatively.

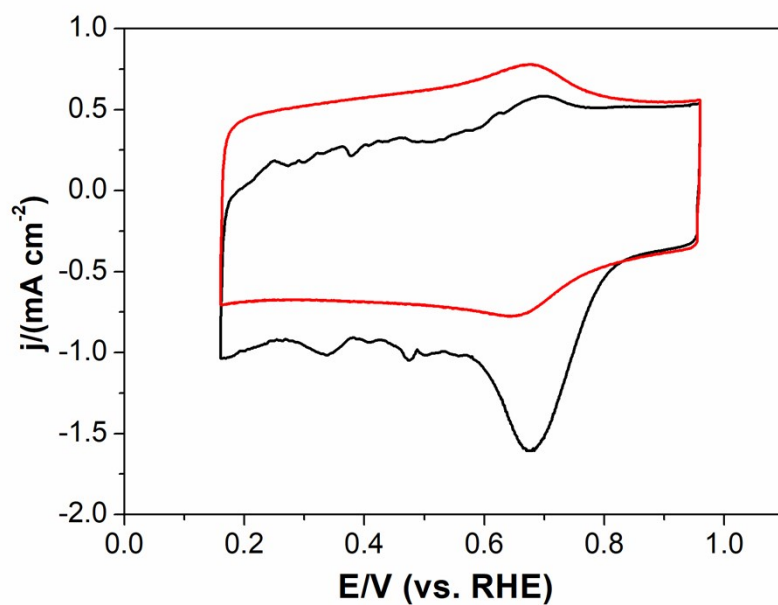

Figure S11. Cyclic voltammograms for Fe<sub>3</sub>C/NC-800 obtained in 0.1 M HClO<sub>4</sub> at a scanning rate of 50 mV/s with O<sub>2</sub> saturated (black line) and Ar saturated (red line). The scan was performed negatively.

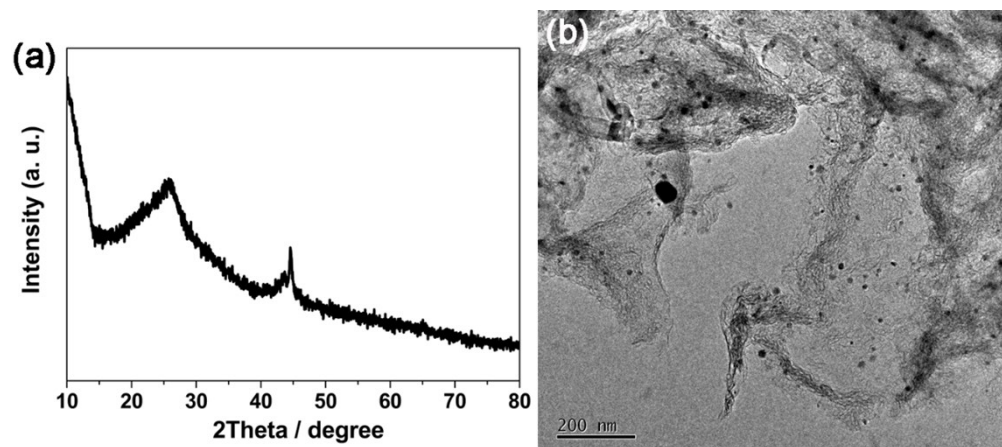

Figure S12. Fe<sub>3</sub>C/NC-800 catalyst after *i-t* test: (a) XRD pattern; (b) TEM image.



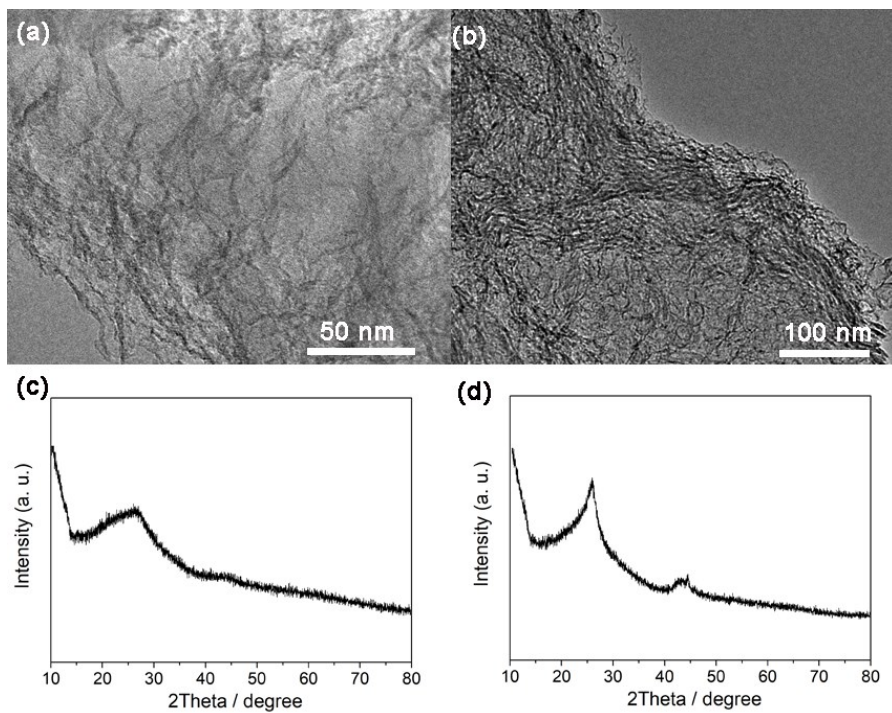

Figure S13. TEM images and XRD patterns of the FeNC-700 (a, c) and FeNC-900 (b, d).

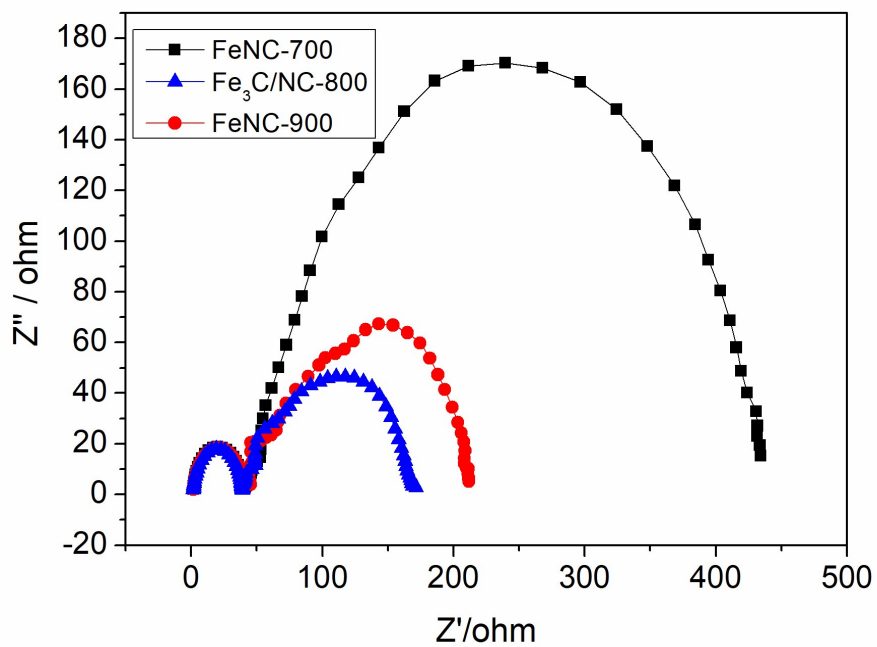

Figure S14. Electrochemical impedance spectroscopy data for samples obtained at 700, 800 and 900°C, respectively.

## 2. Supplementary Tables

Table S1. Percentage of different kinds of N in Fe<sub>3</sub>C/NC-800 and FeNC-800-M.

| Sample                   | N content | graphitic N | pyridinic N | FeN   | oxidized N | pyrrolic N |
|--------------------------|-----------|-------------|-------------|-------|------------|------------|
| Fe <sub>3</sub> C/NC-800 | 7.8%      | 36.5%       | 33.8%       | 14.5% | 5.9%       | 9.3%       |
| FeNC-800-M               | 4.5%      | 41.0%       | 31.4%       | 9.1   | 14.5%      | 13.1%      |

Table S2. Comparison of ORR catalytic performances in alkaline solution between Fe<sub>3</sub>C/NC-800 and other non-precious metal-based catalysts reported previously.

| Catalyst                                    | Onset potential<br>(V vs. RHE) | Half-wave potential<br>(V vs. RHE) | Mass loading<br>( $\mu\text{g cm}^{-2}$ ) | Ref.      |
|---------------------------------------------|--------------------------------|------------------------------------|-------------------------------------------|-----------|
| Fe <sub>3</sub> C/NC-800                    | 1.0                            | 0.85                               | 150                                       | This work |
| NCNT/CoO-NiO-NiCo                           | 1.0                            | 0.83                               | 210                                       | 1         |
| D-AC@2Mn-4Co                                | 0.88                           | 0.80                               | 160                                       | 2         |
| GNPCSS-800                                  | 0.957                          | 0.82                               | 200                                       | 3         |
| Fe-N/C-800                                  | 0.92                           | 0.81                               | 100                                       | 4         |
| NCNT/Ni-NiMn <sub>2</sub> O <sub>4</sub>    |                                | 0.71                               | 210                                       | 5         |
| Co@Co <sub>3</sub> O <sub>4</sub> @<br>C-CM | 0.93                           | 0.81                               | 350                                       | 6         |
| Fe <sub>1</sub> /N, S-PC                    | 1.0                            | 0.90                               | 510                                       | 7         |
| NC-900                                      | 0.83                           | 0.68                               | 100                                       | 8         |
| Fe-N-C/rGO                                  | 0.94                           | 0.81                               | 3939                                      | 9         |
| FePhen@MOF-ArNH <sub>3</sub>                | 1.03                           | 0.86                               | 3000                                      | 10        |
| S-Fe/N/C                                    | 0.91                           | 0.80                               | 160                                       | 11        |
| Fe-NCB-900                                  | -                              | 0.8                                | 4000                                      | 12        |

|                                         |                    |                    |     |    |
|-----------------------------------------|--------------------|--------------------|-----|----|
| Fe@C-NG/NCNTs                           | 0.93               | 0.84               | 240 | 13 |
| N-Fe/G(100)-900                         | 0.89               | 0.81               | 50  | 14 |
| Fe <sub>3</sub> C/C-800                 | 1.05               | 0.83               | 600 | 15 |
| Fe-N <sub>2</sub> -800                  | -0.077 V (vs. SCE) | -0.25 V (vs. SCE), | 313 | 16 |
| Fe <sub>3</sub> O <sub>4</sub> /FeNSG-3 | 0.95               | 0.81               | 200 | 17 |
| Co@CoO@NC/C                             | 0.92               | 0.81               | 420 | 18 |
| CNPs                                    | 1.03               | 0.85               | 385 | 19 |
| Fe-BC-800                               | 0.94               | 0.80               | 420 | 20 |

Table S3. Comparison of ORR catalytic performances in acid media between Fe<sub>3</sub>C/NC-800 and other non-precious metal-based catalysts reported previously.

| Catalyst                                | Onset potential<br>(V vs. RHE) | Half-wave potential<br>(V vs. RHE) | Mass loading<br>( $\mu\text{g cm}^{-2}$ ) | Ref.      |
|-----------------------------------------|--------------------------------|------------------------------------|-------------------------------------------|-----------|
| FeNC-800                                | 0.88                           | 0.7                                | 150                                       | This work |
| Fe <sub>3</sub> C/C-700                 | 0.9                            | 0.73                               | 600                                       | 15        |
| Fe-N-HCMS                               | 0.81                           | 0.6                                | 1199                                      | 21        |
| Fe <sub>3</sub> O <sub>4</sub> /FeNSG-3 | 0.75                           | /                                  | 200                                       | 17        |
| CPANIFe-NaCl                            | 0.91                           | 0.74                               | 600                                       | 22        |
| PANI-Fe                                 | 0.85                           | /                                  | 600                                       | 23        |
| Fe-N/C-800                              | 0.8                            | 0.68                               | 100                                       | 24        |
| pPMF-800                                | 0.89                           | 0.71                               | 1200                                      | 25        |
| Fe <sub>3</sub> C/NG-800                | 0.92                           | 0.77                               | 400                                       | 26        |

|                                                |      |      |      |    |
|------------------------------------------------|------|------|------|----|
| NH <sub>3</sub> -Fe <sub>0.25</sub> -N/C-900   | 0.94 | 0.68 | 125  | 27 |
| FeNC-700                                       | 0.8  | /    | 100  | 28 |
| NH <sub>3</sub> -Fe <sub>0.25</sub> -N/C-900   | 0.94 | 0.71 | 400  | 27 |
| H-Fe@N-C/RGO                                   | 0.89 | 0.67 | 315  | 29 |
| N-Fe/G (60)-900-S                              | 0.83 | 0.72 | 500  | 14 |
| FeCo-PANI-TPP-NH <sub>3</sub>                  | 0.85 | 0.73 | 2550 | 30 |
| Fe-g-C <sub>3</sub> N <sub>4</sub> @C          |      | 0.75 | 600  | 31 |
| PpPD-Fe-C                                      | 0.83 | 0.72 | 200  | 32 |
| Fe-N-GC-900                                    | /    | 0.74 | 600  | 33 |
| N, P-CGHNs                                     | 0.9  | 0.68 | 600  | 34 |
| Fe-N/MPC2                                      | 0.82 | 0.7  | 637  | 35 |
| (Fe <sub>1-x</sub> S/N, S-MCNS) <sub>0.2</sub> | 0.81 | 0.73 | 400  | 36 |
| N/Fe-CG                                        | 0.93 | 0.73 | 170  | 37 |
| Fe-N/C                                         | 0.8  | 0.55 | 270  | 38 |

### 3. Reference

- [1] X. Liu, M. Park, M. G. Kim, S. Gupta, G. Wu and J. Cho, *Angew. Chem. Int. Ed.*, **2015**, 54, 9654-9658.
- [2] X. Yan, Y. Jia, J. Chen, Z. Zhu and X. Yao, *Adv. Mater.*, **2016**, 28, 8771-8778.
- [3] H.-x. Zhong, J. Wang, Y.-w. Zhang, W.-l. Xu, W. Xing, D. Xu, Y.-f. Zhang and X.-b. Zhang, *Angew. Chem. Int. Ed.*, **2014**, 53, 14235-14239.
- [4] L. Lin, Q. Zhu and A. W. Xu, *J. Am. Chem. Soc.*, **2014**, 136, 11027-11033.
- [5] Q. Qin, L. Chen, T. Wei, Y. Wang and X. Liu, *Catal. Sci. Technol.*, **2019**, 9, 1595-1601.
- [6] W. Xia, R. Zou, L. An, D. Xia and S. Guo, *Energy Environ. Sci.*, **2015**, 8, 568-576.

- [7] K. Wu, X. Chen, S. Liu, Y. Pan, W.-C. Cheong, W. Zhu, X. Cao, R. Shen, W. Chen, J. Luo, W. Yan, L. Zheng, Z. Chen, D. Wang, Q. Peng, C. Chen and Y. Li, *Nano Res.*, **2018**, 11, 6260-6269.
- [8] A. Aijaz, N. Fujiwara and Q. Xu, *J. Am. Chem. Soc.*, **2014**, 136, 6790-6793.
- [9] C. Zhang, J. Liu, Y. Ye, Z. Aslam, R. Brydson and C. Liang, *ACS Appl. Mater. Interfaces*, **2018**, 10, 2423-2429.
- [10] K. Strickland, E. Miner, Q. Jia, U. Tylus, N. Ramaswamy, W. Liang, M. T. Sougrati, F. Jaouen and S. Mukerjee, *Nat. Commun.*, **2015**, 6, 7343.
- [11] K. Hu, L. Tao, D. Liu, J. Huo and S. Wang, *ACS Appl. Mater. Interfaces*, **2016**, 8, 19379-19385.
- [12] A. Serov, K. Artyushkova, E. Niangar, C. Wang, N. Dale, F. Jaouen, M.-T. Sougrati, Q. Jia, S. Mukerjee and P. Atanassov, *Nano Energy*, **2015**, 16, 293-300.
- [13] Q. Wang, Y. Lei, Z. Chen, N. Wu, Y. Wang, B. Wang and Y. Wang, *J. Mater. Chem. A*, **2018**, 6, 516-526.
- [14] Q. Lai, Q. Gao, Q. Su, Y. Liang, Y. Wang and Z. Yang, *Nanoscale*, **2015**, 7, 14707-14714.
- [15] Y. Hu, J. O. Jensen, W. Zhang, L. N. Cleemann, W. Xing, N. J. Bjerrum and Q. Li, *Angew. Chem. Int. Ed.*, **2014**, 53, 3675-3679.
- [16] D. Guo, S. Han, J. Wang and Y. Zhu, *Appl. Surf. Sci.*, **2018**, 434, 1266-1273.
- [17] Y. Li, Y. Zhou, C. Zhu, Y. H. Hu, S. Gao, Q. Liu, X. Cheng, L. Zhang, J. Yang and Y. Lin, *Catal. Sci. Technol.*, **2018**, 8, 5325-5333.
- [18] Z. Wu, J. Wang, L. Han, R. Lin, H. Liu, H. L. Xin and D. Wang, *Nanoscale*, **2016**, 8, 4681-4687.
- [19] S. Zhao, H. Yin, L. Du, L. He, K. Zhao, L. Chang, G. Yin, H. Zhao, S. Liu and Z. Tang, *ACS Nano*, **2014**, 8, 12660-12668.
- [20] X. Ma, Z. Lei, W. Feng, Y. Ye and C. Feng, *Carbon*, **2017**, 123, 481-491.
- [21] M. Zhou, C. Yang and K.-Y. Chan, *Adv. Energy Mater.*, **2014**, 4, 1400840.
- [22] W. Ding, L. Li, K. Xiong, Y. Wang, W. Li, Y. Nie, S. Chen, X. Qi and Z. Wei, *J. Am. Chem. Soc.*, **2015**, 137, 5414-5420.
- [23] H.-W. Liang, W. Wei, Z.-S. Wu, X. Feng and K. Muellen, *J. Am. Chem. Soc.*, **2013**, 135, 16002-16005.
- [24] L. Lin, Q. Zhu and A.-W. Xu, *J. Am. Chem. Soc.*, **2014**, 136, 11027-11033.
- [25] W. Yang, X. Yue, X. Liu, L. Chen, J. Jia and S. Guo, *Nanoscale*, **2016**, 8, 959-964.
- [26] M. Xiao, J. Zhu, L. Feng, C. Liu and W. Xing, *Adv. Mater.*, **2015**, 27, 2521-2527.
- [27] H. Tan, Y. Li, X. Jiang, J. Tang, Z. Wang, H. Qian, P. Mei, V. Malgras, Y. Bando and Y. Yamauchi, *Nano Energy*, **2017**, 36, 286-294.
- [28] T. Palaniselvam, B. P. Biswal, R. Banerjee and S. Kurungot, *Chem. Eur. J.*, **2013**, 19, 9335-9342.
- [29] J. Wang, G. Wang, S. Miao, J. Li and X. Bao, *Faraday Discuss.*, **2014**, 176, 135-151.
- [30] Q. Zhang, J. Wang, P. Yu, F. Song, X. Yin, R. Chen, H. Nie, X. Zhang and W. Yang, *Carbon*, **2018**, 132, 85-94.
- [31] M.-Q. Wang, W.-H. Yang, H.-H. Wang, C. Chen, Z.-Y. Zhou and S.-G. Sun, *ACS Catal.*, **2014**, 4, 3928-3936.
- [32] Z. Xiang, Y. Xue, D. Cao, L. Huang, J.-F. Chen and L. Dai, *Angew. Chem. Int. Ed.*, **2014**, 53, 2433-2437.
- [33] A. Kong, X. Zhu, Z. Han, Y. Yu, Y. Zhang, B. Dong and Y. Shan, *ACS Catal.*, **2014**, 4, 1793-1800.
- [34] J. Yang, H. Sun, H. Liang, H. Ji, L. Song, C. Gao and H. Xu, *Adv. Mater.*, **2016**, 28, 4606-4613.
- [35] L. Osmieri, R. Escudero-Cid, M. Armandi, A. H. A. Monteverde Videla, J. L. Garcia Fierro, P. Ocon and S. Specchia, *Appl. Catal., B*, **2017**, 205, 637-653.
- [36] J. Xiao, Y. Xia, C. Hu, J. Xi and S. Wang, *J. Mater. Chem. A*, **2017**, 5, 11114-11123.
- [37] B. Li, S. P. Sasikala, D. H. Kim, J. Bak, I.-D. Kim, E. Cho and S. O. Kim, *Nano Energy*, **2019**, 56, 524-530.
- [38] D. Malko and A. Kucernak, *Electrochem. Commun.*, **2017**, 83, 67-71.
